# Supplementary material for: Microstructures and electronic characters of β-Ga2O3 on different substrates: exploring the role of surface chemistry and structures
Source: Royal Society of Chemistry journal article supplement (doi:10.1039/d1cp02687a), 2021-01-01
Supplement: d1cp02687a1.pdf [file d1cp02687a1.pdf]

**Microstructures and electronic characters of  $\beta$ -Ga<sub>2</sub>O<sub>3</sub> on different substrates: Exploring the role of surface chemistry and structure**

Naxin Zhu <sup>a</sup>, Xiangyi Xue <sup>a</sup>, Jie Su <sup>a,b\*</sup>

<sup>a</sup> State Key Lab of Solidification Processing, College of Materials Science and Engineering, Northwestern Polytechnical University, Xi'an, Shaanxi 710072, PR China

<sup>b</sup> State Key Discipline Laboratory of Wide Band Gap Semiconductor Technology, School of Microelectronics, Xidian University, Xi'an 710071, China

E-mail: sujie@xidian.edu.cn

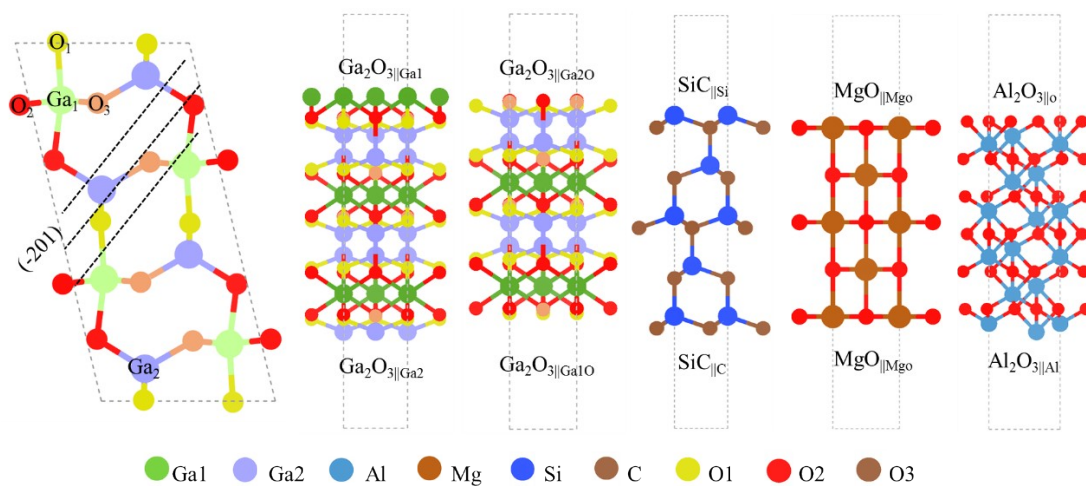

**Figure S1.** Side views of  $\beta$ -Ga<sub>2</sub>O<sub>3</sub>, and  $\beta$ -Ga<sub>2</sub>O<sub>3</sub> (-201) surfaces, SiC (0001) surfaces, MgO (001) surfaces, Al<sub>2</sub>O<sub>3</sub> (001) surfaces with different terminations.

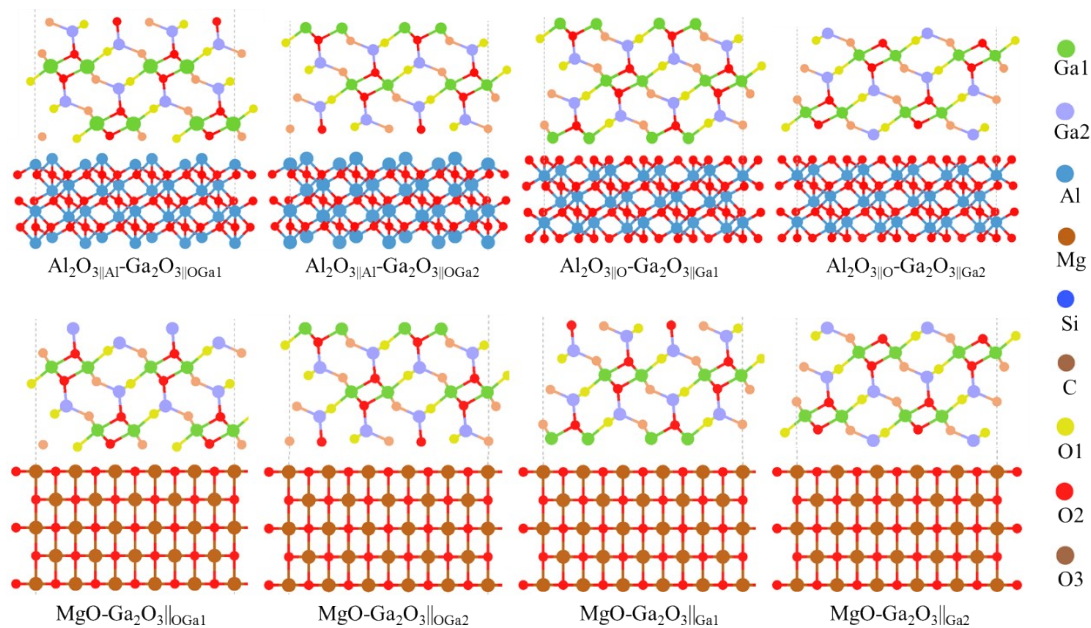

**Figure S2.** Side views of  $\text{Al}_2\text{O}_3\text{-Ga}_2\text{O}_3$  and  $\text{MgO-Ga}_2\text{O}_3$  interfaces with different terminations.

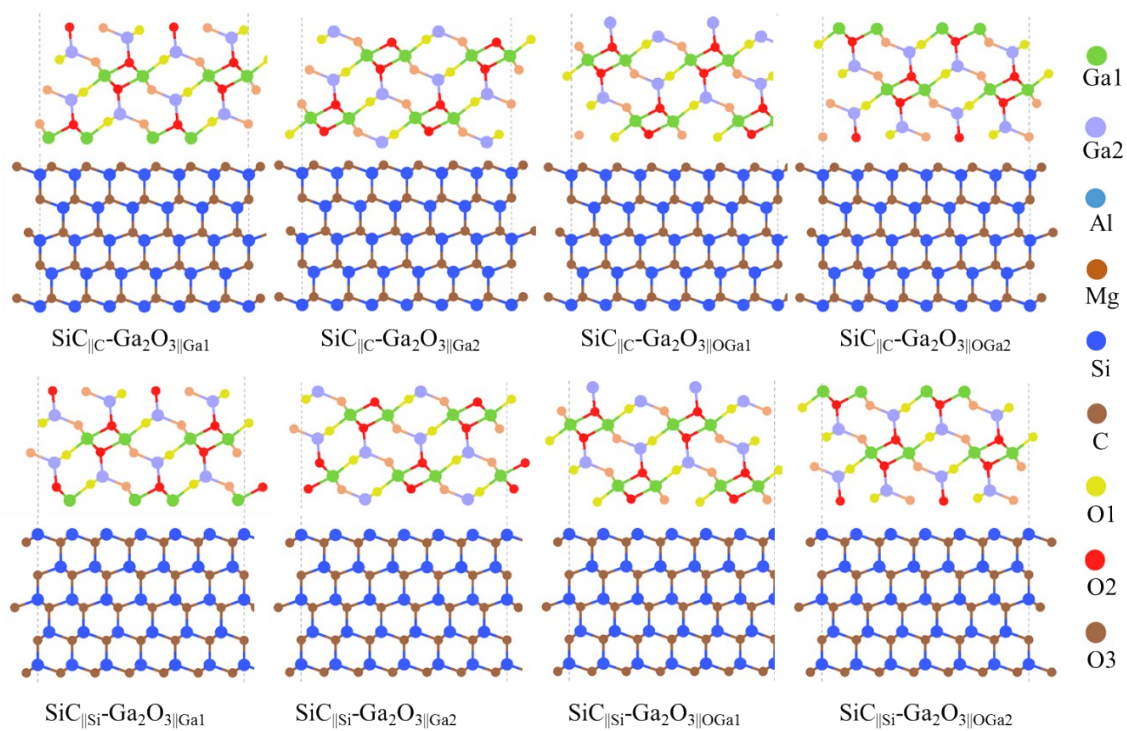

**Figure S3.** Side views of  $\text{SiC-Ga}_2\text{O}_3$  interfaces with different terminations.

**Table S1.** The lattice strain along a and b direction and the average lattice strain of  $\beta$ -Ga<sub>2</sub>O<sub>3</sub> in these different Al<sub>2</sub>O<sub>3</sub>-Ga<sub>2</sub>O<sub>3</sub>, MgO-Ga<sub>2</sub>O<sub>3</sub>, and SiC-Ga<sub>2</sub>O<sub>3</sub> interfaces. The difference of dangling bonds between Ga<sub>2</sub>O<sub>3</sub> and substrate part in these substrate-Ga<sub>2</sub>O<sub>3</sub> interfaces with different terminations.

| Interface                                                                                        | Strain (%)  |             |         | Dangling bonds |
|--------------------------------------------------------------------------------------------------|-------------|-------------|---------|----------------|
|                                                                                                  | a direction | b direction | average |                |
| Al <sub>2</sub> O <sub>3</sub> <sub>  Al</sub> -Ga <sub>2</sub> O <sub>3</sub> <sub>  OGa1</sub> | 10.35       | 2.55        | 4.3     | 2              |
| Al <sub>2</sub> O <sub>3</sub> <sub>  Al</sub> -Ga <sub>2</sub> O <sub>3</sub> <sub>  OGa2</sub> | 10.35       | 2.55        | 4.3     | 1              |
| Al <sub>2</sub> O <sub>3</sub> <sub>  O</sub> -Ga <sub>2</sub> O <sub>3</sub> <sub>  Ga1</sub>   | 10.35       | 2.55        | 4.3     | 12             |
| Al <sub>2</sub> O <sub>3</sub> <sub>  O</sub> -Ga <sub>2</sub> O <sub>3</sub> <sub>  Ga2</sub>   | 10.35       | 2.55        | 4.3     | 12             |
| MgO-Ga <sub>2</sub> O <sub>3</sub> <sub>  OGa1</sub>                                             | -0.34       | -3.75       | -1.36   | 8              |
| MgO-Ga <sub>2</sub> O <sub>3</sub> <sub>  OGa2</sub>                                             | -0.34       | -3.75       | -1.36   | 8              |
| MgO-Ga <sub>2</sub> O <sub>3</sub> <sub>  Ga1</sub>                                              | -0.34       | -3.75       | -1.36   | 2              |
| MgO-Ga <sub>2</sub> O <sub>3</sub> <sub>  Ga2</sub>                                              | -0.34       | -3.75       | -1.36   | 5              |
| SiC <sub>  C</sub> -Ga <sub>2</sub> O <sub>3</sub> <sub>  OGa1</sub>                             | 5.73        | -1.29       | 2.52    | 0              |
| SiC <sub>  C</sub> -Ga <sub>2</sub> O <sub>3</sub> <sub>  OGa2</sub>                             | 5.73        | -1.29       | 2.52    | 0              |
| SiC <sub>  C</sub> -Ga <sub>2</sub> O <sub>3</sub> <sub>  Ga1</sub>                              | 5.73        | -1.29       | 2.52    | 2              |
| SiC <sub>  C</sub> -Ga <sub>2</sub> O <sub>3</sub> <sub>  Ga2</sub>                              | 5.73        | -1.29       | 2.52    | 4              |
| SiC <sub>  Si</sub> -Ga <sub>2</sub> O <sub>3</sub> <sub>  OGa1</sub>                            | 5.73        | -1.29       | 2.52    | 0              |
| SiC <sub>  Si</sub> -Ga <sub>2</sub> O <sub>3</sub> <sub>  OGa2</sub>                            | 5.73        | -1.29       | 2.52    | 0              |
| SiC <sub>  Si</sub> -Ga <sub>2</sub> O <sub>3</sub> <sub>  Ga1</sub>                             | 5.73        | -1.29       | 2.52    | 2              |
| SiC <sub>  Si</sub> -Ga <sub>2</sub> O <sub>3</sub> <sub>  Ga2</sub>                             | 5.73        | -1.29       | 2.52    | 4              |

**Table S2.** The valence band offset (VBO) and conduction band offset (CBO) coupling with the band gap of Ga<sub>2</sub>O<sub>3</sub> part in these different Al<sub>2</sub>O<sub>3</sub>-Ga<sub>2</sub>O<sub>3</sub>, MgO-Ga<sub>2</sub>O<sub>3</sub>, and SiC-Ga<sub>2</sub>O<sub>3</sub> interfaces.

| Interface                                                                                        | VBO (eV) | CBO (eV) | Gap (eV) | Band alignment |
|--------------------------------------------------------------------------------------------------|----------|----------|----------|----------------|
| Al <sub>2</sub> O <sub>3</sub> <sub>  O</sub> -Ga <sub>2</sub> O <sub>3</sub> <sub>  Ga2</sub>   | 0.02     | 0.45     | 2.60     | Type-II        |
| Al <sub>2</sub> O <sub>3</sub> <sub>  O</sub> -Ga <sub>2</sub> O <sub>3</sub> <sub>  Ga1</sub>   | 0.10     | 0.23     | 2.82     | Type-II        |
| Al <sub>2</sub> O <sub>3</sub> <sub>  Al</sub> -Ga <sub>2</sub> O <sub>3</sub> <sub>  OGa2</sub> | 0.12     | 0.50     | 3.30     | Type-II        |
| Al <sub>2</sub> O <sub>3</sub> <sub>  Al</sub> -Ga <sub>2</sub> O <sub>3</sub> <sub>  OGa1</sub> | 0.25     | 0.94     | 2.70     | Type-II        |
| MgO-Ga <sub>2</sub> O <sub>3</sub> <sub>  Ga2</sub>                                              | 0.12     | 0.22     | 3.42     | Type-I         |
| MgO-Ga <sub>2</sub> O <sub>3</sub> <sub>  Ga1</sub>                                              | 0.65     | 0.31     | 2.79     | Type-I         |
| MgO-Ga <sub>2</sub> O <sub>3</sub> <sub>  OGa2</sub>                                             | 0.15     | 0.58     | 3.42     | Type-I         |
| MgO-Ga <sub>2</sub> O <sub>3</sub> <sub>  OGa1</sub>                                             | 0.25     | 0.56     | 3.18     | Type-I         |
| SiC <sub>  Si</sub> -Ga <sub>2</sub> O <sub>3</sub> <sub>  Ga2</sub>                             | 0.39     | 0.07     | 2.43     | Type-II        |
| SiC <sub>  Si</sub> -Ga <sub>2</sub> O <sub>3</sub> <sub>  Ga1</sub>                             | 0.45     | 0.11     | 2.43     | Type-II        |
| SiC <sub>  Si</sub> -Ga <sub>2</sub> O <sub>3</sub> <sub>  OGa2</sub>                            | 0.06     | 0.27     | 3.35     | Type-I         |
| SiC <sub>  Si</sub> -Ga <sub>2</sub> O <sub>3</sub> <sub>  OGa1</sub>                            | 0.02     | 0.42     | 3.22     | Type-I         |
| SiC <sub>  C</sub> -Ga <sub>2</sub> O <sub>3</sub> <sub>  Ga2</sub>                              | 0.61     | 0.09     | 2.75     | Type-II        |
| SiC <sub>  C</sub> -Ga <sub>2</sub> O <sub>3</sub> <sub>  Ga1</sub>                              | 0.39     | 0.23     | 2.68     | Type-II        |
| SiC <sub>  C</sub> -Ga <sub>2</sub> O <sub>3</sub> <sub>  OGa2</sub>                             | 0.12     | 0.29     | 3.05     | Type-I         |
| SiC <sub>  C</sub> -Ga <sub>2</sub> O <sub>3</sub> <sub>  OGa1</sub>                             | 0.08     | 0.42     | 2.98     | Type-I         |
